# Supplementary material for: LncRNA and Protein Expression Profiles Reveal Heart Adaptation to High-Altitude Hypoxia in Tibetan Sheep
Source: MDPI journal article supplement (doi:10.3390/ijms25010385), 2023-12-27
Supplement: s1 [file s1]

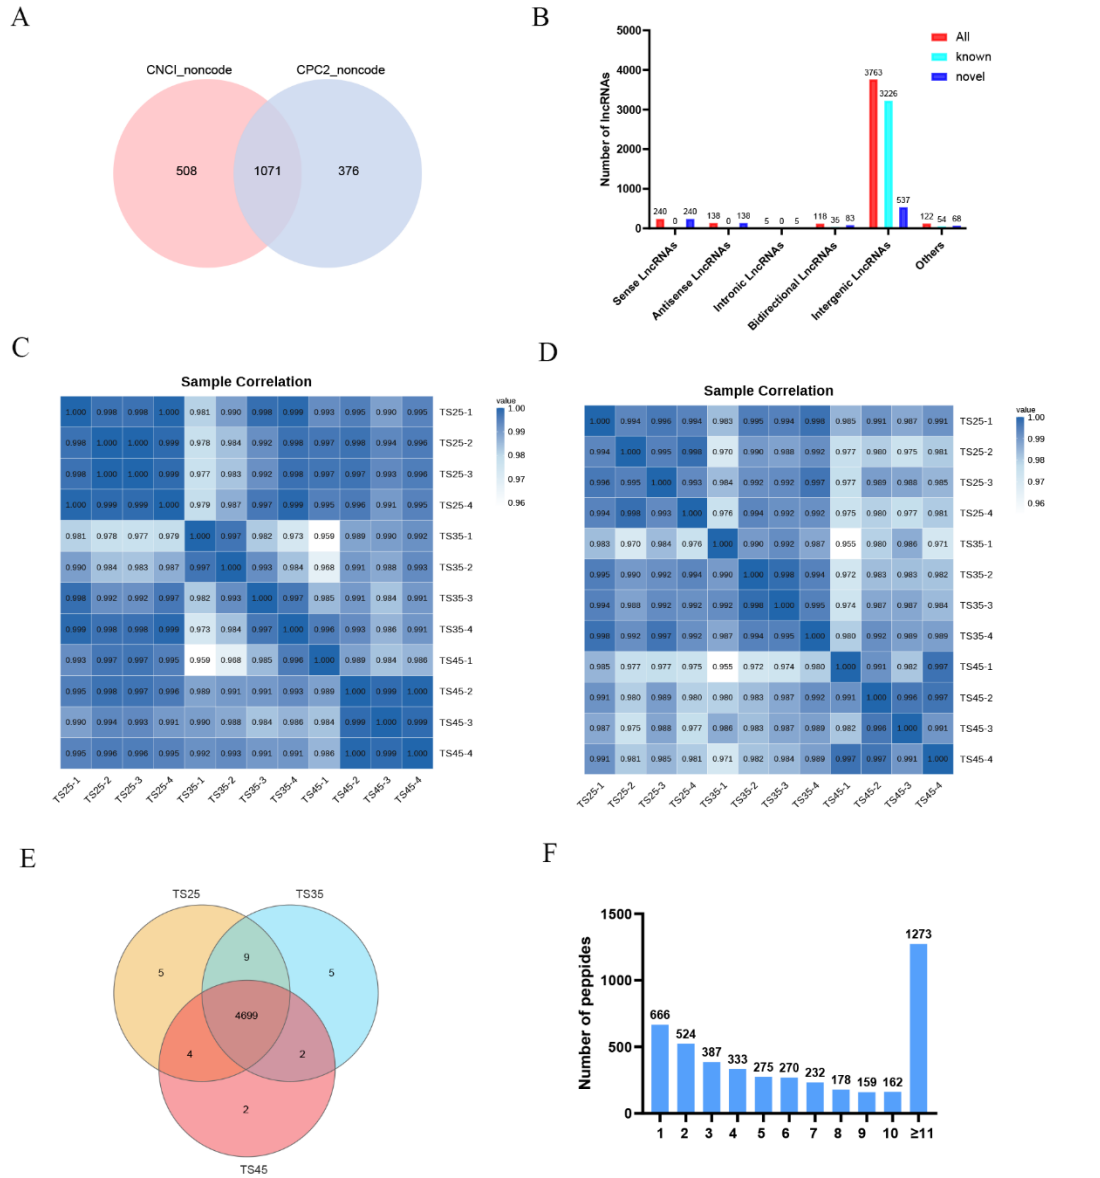

**Figure S1. Characteristic analysis of lnc RNAs and proteins in the heart of Tibetan sheep at different altitudes. (A) CNCI\_noncode\_CPC2\_noncode; (B) lncRNAs type statistics; (C) The correlation of the lncRNA expression profiles; (D) The correlation of mRNA expression profiles; (E) Venn diagram of proteins in TS25, TS35, and TS45 groups; (F) statistical analysis of the number of protein peptide bars.**
