# Supplementary material for: LncRNA and Protein Expression Profiles Reveal Heart Adaptation to High-Altitude Hypoxia in Tibetan Sheep
Source: MDPI journal article supplement (doi:10.3390/ijms25010385), 2023-12-27
Supplement: s1 [file s1]

Table S2 Differential expression of proteins at three different altitudes

| TS25 vs TS35 | DEP symbol |            |            |          |
|--------------|------------|------------|------------|----------|
|              | Up         |            |            |          |
|              | MYH11      | SERPINA3-8 | ACTA1      | SHMT1    |
|              | MAOB       | BGN        | MYL9       | KRT18    |
|              | FLNA       | GPX3       | CES1       | HBB      |
|              | SLC4A1     | PRELP      | SPP2       | ALDOB    |
|              | SPTA1      | Echdc3     | RGN        | ABCC4    |
|              | EPHX2      | FABP4      | PDLIM7     | FAH      |
|              | GPX1       | ACTN1      | ORM1       | MUSTN1   |
|              | ANK1       | NAAA       | FKBP5      | LTBP2    |
|              | CP         | COL18A1    | INPP1      | PSPH     |
|              | LAMA5      | AKR1C1     | CRYM       | ITGA3    |
|              | ANKRD1     | SERPINA3-3 | CPS1       | Lmod1    |
|              | CA4        | KRT19      | EPB42      | ACAT2    |
|              | CNN1       | LGALS1     | CSRP1      | Aldh1l1  |
|              | PACSIN1    | CD109      | S100A4     | SYPL2    |
|              | TXNRD1     | THEM4      | EHHADH     | MGP      |
|              | HSPB6      | MYOT       | GBP3       | PCBD1    |
|              | Cryz12     | GAA        | PGFS       | Rdh13    |
|              | MFGE8      | ACAA1      | PLXDC2     | ANGPTL2  |
|              | HPX        | VNN1       | CRP        | S100B    |
|              | HBA1       | VNN1       | LIPE       | AADAT    |
|              | HBB        | EFEMP1     | ATP6V0C    | GVINP1   |
|              | KRT8       | ASS1       | OGN        | MGRN1    |
|              | CA2        | MYLK       | SELENOM    | ACSM5    |
|              | CKB        | Gstm5      | HSD11B1    | TEX2     |
|              | TAGLN      | SMTN       | FBP1       | PODN     |
|              | SOD3       | TKFC       | CSRP2      | APOE     |
|              | ADH1C      | CLYBL      |            |          |
|              | Down       |            |            |          |
|              |            |            |            |          |
|              | FN1        | IGHA1      | FETUB      | CST3     |
|              | APOA4      | PNMT       | PGLYRP1    | NUDT8    |
|              | TFRC       | TNNI1      | APOC3      | DTD1     |
|              | APOA1      | LTF        | HMGN2      | IGLV2-11 |
|              | Acot11     | IGLV3-1    | CFD        | IGLV2-11 |
|              | Igkc       | C12orf10   | C1qc       | IGLV2-11 |
|              | GCHFR      | PRKAG3     | SERPINA3-6 | IGLV2-11 |
|              | PLVAP      | C4BPA      | CHCHD2     | IGLV2-11 |
|              | ITIH2      | CFP        | DPYD       | MCRIP1   |
|              | A1BG       | APOA2      | ECM1       | MARCHF5  |
|              | LDHD       | IGLV2-14   | CFHR2      | IGLV3-19 |
|              | CD5L       | IGLV2-14   | MTMR6      | AZU1     |
|              | POLR2H     | STMN1      | STK39      | TEX264   |
|              | APOH       | JCHAIN     | MCM7       | WDR73    |
|              | H1-5       | AQP1       | MPO        | CRYL1    |

|              |      | MYL7<br>GSTT1 | IGLV3-25<br>MCEE | ITPA     | KCTD10   |
|--------------|------|---------------|------------------|----------|----------|
| TS35 vs TS45 | Up   | Lamb1         | HLA-DRA          | H2AC21   | CD48     |
|              |      | TFRC          | TNNI1            | SERPINA6 | SYN1     |
|              |      | LMNB1         | IDO1             | RFTN1    | SPARC    |
|              |      | WARS1         | SMPDL3B          | FRZB     | TTL      |
|              |      | ITGA5         | REEP5            | CELF2    | CD74     |
|              |      | ICA           | GCHFR            | GSTT1    | POLR2H   |
|              |      | NIPSNAP3A     | Igkc             | CFD      | MBL      |
|              |      | FSCN1         | CDK6             | BoLA-DQB | FBN2     |
|              |      | SERPINH1      | COX18            | TSPO     | PRKRA    |
|              |      | STAT1         | STMN1            | NAF1     | IGLV1-40 |
|              |      | FBLN5         | GIMAP7           | CTSW     | IGLV1-40 |
|              |      | LTBP4         | CAMK2A           | NASP     | IGLV1-40 |
|              |      | BPHL          | BAK1             | NASP     | IGLV1-40 |
|              |      | DHTKD1        | H1-1             | Prkcg    | APOM     |
|              |      | H1-5          | MTHFR            | RBM26    | SMCHD1   |
|              |      | SERPINF1      | TMEM201          | COLGALT1 | RAB30    |
|              |      | Coro6         | Gimap4           | WDR73    | RHAG     |
|              |      | IGLV3-25      | SCPEP1           | CA3      | WDR47    |
|              |      | Ahcyl2        | CASK             | ANP32A   | STRIP2   |
|              |      | SAMHD1        | CRYL1            | PDCD4    | MYH1     |
|              |      | H1-0          | IFI16            | RCC2     | MX1      |
|              |      | OLFML2A       | Ppp1r1a          | LSM5     | LIN7B    |
|              | Down | MYH11         | LGALS3           | SELENOF  | APOE     |
|              |      | FLNA          | TPP1             | SAA4     | KRT18    |
|              |      | MAOB          | VNN1             | COL12A1  | ALDOB    |
|              |      | EPHX2         | VNN1             | SELENOM  | PSPH     |
|              |      | GPX1          | MSRA             | A1m      | PGPEP1   |
|              |      | TXNRD1        | CKB              | THBS1    | ITGA3    |
|              |      | ADH1C         | CLU              | S100A1   | ANXA8    |
|              |      | SDR39U1       | NAAA             | INPP1    | CES1     |
|              |      | ASPN          | SOD3             | F9       | ADAMTSL5 |
|              |      | CAT           | ACTN1            | DPY19L1  | CRYM     |
|              |      | MYL7          | ACTA1            | SELENOO  | CTSF     |
|              |      | TAGLN         | AOC1             | LIPE     | ELMOD1   |
|              |      | KRT8          | AK4              | ATP6V0C  | PTGIS    |
|              |      | CTSD          | KLHL31           | PECR     | Ntn4     |
|              |      | GPX4          | PTGR1            | S100A4   | PODN     |
|              |      | HPX           | PRELP            | MAP1LC3A | TNC      |
|              |      | AOX1          | ORM1             | Aldh1l1  | PRXL2B   |
|              |      | MFGE8         | OGN              | CPS1     | HBB      |
|              |      | CNN1          | Srm              | EHHADH   | RBM3     |
|              |      | BLVRA         | PDLIM7           | CSRP2    | ACTG2    |

|              |      |            |          |          |           |
|--------------|------|------------|----------|----------|-----------|
|              |      | ITIH4      | FAH      | PDLIM3   | MVK       |
|              |      | FABP4      | ASS1     | ACAT2    | SMG1      |
|              |      | GPX3       | HEBP1    | THA2     | FAM53C    |
|              |      | LGALS1     | MYLK     | TNXB     | ACOX3     |
|              |      | BGN        | PPT1     | Patr-A   | RECK      |
|              |      | SERPINB2   | Rbbp9    | Lmod1    | PTP4A1    |
|              |      | SERPINA3-7 | MYL9     | PAPLN    | TMEM109   |
|              |      | PACSIN1    | CRP      | PTER     | LECT2     |
|              |      | ECI1       | TACO1    | NPC1     | MYOT      |
|              |      | NDUFAF7    | LUM      | PGF5     | FUOM      |
|              |      | SERPINA3-3 | THEM4    | SURF1    | DPT       |
|              |      | SERPINA3-8 | RGN      | EBP      | CSRP1     |
|              |      | TNXB       | CA4      | FBLIM1   | KRT19     |
|              |      | OAT        | MUSTN1   | PSAT1    |           |
| TS25 vs TS45 | Up   | SLC4A1     | EFEMP1   | SMPDL3B  | VAT1L     |
|              |      | SPTA1      | HLA-DRA  | BAK1     | HLA-A     |
|              |      | LMNB1      | ITIH5    | SCAMP2   | Patr-A    |
|              |      | WARS1      | H1-5     | MTHFR    | CASK      |
|              |      | ICA        | SERPINH1 | SMTNL2   | BoLA-DQB  |
|              |      | ADSS1      | RIDA     | Gimap4   | PYCARD    |
|              |      | LTBP4      | RIDA     | COX18    | PRKRA     |
|              |      | NIPSNAP3A  | RIDA     | ABCC4    | Rdh13     |
|              |      | ITGA5      | SPP2     | H1-1     | SPARC     |
|              |      | DARS2      | TMEM65   | NME4     | GVINP1    |
|              |      | SAMHD1     | PDXK     | TSPO     | IGLV1-40  |
|              |      | CA4        | OLFML2A  | HLA-DRB1 | SPARCL1   |
|              |      | FSCN1      | Rrbp1    | SCPEP1   | FRZB      |
|              |      | BPHL       | REEP5    | MYOT     | SYPL2     |
|              |      | ADK        | GIMAP7   | CD74     | EEF1AKMT1 |
|              |      | ANKRD1     | Cryz12   | RHAG     | FABP7     |
|              |      | FBLN5      | LTBP2    | TMEM201  | CTSW      |
|              |      | GAA        | IDO1     | CA3      | MYL1      |
|              |      | PGM2       | GBP3     | IGFBP5   | SAT2      |
|              |      | CA2        | S100B    | ABCC4    | MGP       |
|              |      | HSPB6      | Abcb6    | ANP32A   | CPT1A     |
|              | Down | GPX1       | AOC1     | TPP1     | RBM3      |
|              |      | MAOB       | ASAH1    | DPY19L1  | ELOVL1    |
|              |      | ALDH1A1    | AK4      | SAA4     | TFF2      |
|              |      | SDR39U1    | COL6A6   | MAP1LC3A | SELENOO   |
|              |      | AOX1       | KRT8     | ORM1     | APOA2     |
|              |      | MYL7       | AQP1     | CD5L     | CTSF      |
|              |      | ASPN       | LTF      | ELMOD1   | DPYD      |
|              |      | ADH1C      | KRT19    | FABP4    | TNNI1     |
|              |      | ECI1       | OAT      | PAPLN    | UBL7      |
|              |      |            |          |          |           |

|            |          |            |          |
|------------|----------|------------|----------|
| TNXB       | CRP      | Patr-A     | CRYM     |
| SERPINA3-7 | CLU      | FADD       | MFAP2    |
| PLVAP      | TNXB     | FAH        | PSAT1    |
| SERPINB2   | VWF      | IGLV3-1    | DTYMK    |
| BLVRA      | ADAMTSL5 | PCP4L1     | GTPBP8   |
| GPX4       | MSRB2    | PGPEP1     | SNX24    |
| AS3MT      | GCHFR    | PKIA       | SNX24    |
| ACSL3      | Igkc     | PKIA       | JCHAIN   |
| HEBP1      | SELENOF  | PKIA       | UBL5     |
| ADI1       | SURF1    | PKIA       | SRGAP2   |
| ITIH4      | NAAA     | GSTT1      | PDSS2    |
| PECR       | --       | SERPINA3-6 | CHCHD5   |
| APOH       | PRKAG3   | CFP        | RNF181   |
| LDHD       | ECM1     | IGHA1      | CYP2F3   |
| TXNRD1     | SELENOM  | METAP1D    | Rbbp9    |
| KLHL31     | MCEE     | LBP        | HLA-A    |
| GPX3       | A1m      | ATP23      | LGALS3   |
| PTGR1      | IGLV2-14 | STK39      | IGLV2-14 |
| PTER       |          |            |          |

---
