# Supplementary material for: LncRNA and Protein Expression Profiles Reveal Heart Adaptation to High-Altitude Hypoxia in Tibetan Sheep
Source: MDPI journal article supplement (doi:10.3390/ijms25010385), 2023-12-27
Supplement: s1 [file s1]

Table S5 Differential expression Proteins in profile 5 and profile 7 of trend clustering analysis

| Pattern   | DEPs    |            |            |          |
|-----------|---------|------------|------------|----------|
| Profile 3 | NDUFAF7 | TNXB       | MAP1LC3A   | EBP      |
|           | UBL5    | CTSF       | MFAP2      | GPX1     |
|           | S100A1  | Ntn4       | ADH1C      | SERPINB2 |
|           | ASPN    | THBS1      | Srm        | Rbbp9    |
|           | PSAT1   | CTSD       | AOX1       | OAT      |
|           | PTP4A1  | TPP1       | GPX4       | FAH      |
|           | HEBP1   | FUOM       | TMEM109    | SMG1     |
|           | RECK    | CLU        | FAM53C     | ITIH4    |
|           | PGPEP1  | ELMOD1     | LGALS3     | KLHL31   |
|           | DPY19L1 | SERPINA3-7 | ACSM5      | PECR     |
|           | TNC     | LBP        | ADAMTSL5   | NPC1     |
|           | SELENOF | CYP2F3     | ACOX3      | AK4      |
|           | SDR39U1 | PAPLN      | CRYM       | PPT1     |
|           | PRXL2B  | PDSS2      | ATP23      | SAA4     |
|           | SELENOO | AOC1       | SELENOM    | ECI1     |
|           | TNXB    | Patr-A     | RBM3       |          |
| Profile 5 | MYLK    | LGALS1     | SERPINA3-8 | PACSIN1  |
|           | S100A4  | MYL9       | ITGA3      | SMTN     |
|           | OGN     | PGFS       | EPHX2      | LIPE     |
|           | ASS1    | MSRA       | MYOT       | Aldh1l1  |
|           | EHHADH  | CNN1       | CAT        | ACTA1    |
|           | FBP1    | COL18A1    | TKFC       | MAOB     |
|           | ALDOB   | DPT        | TXNRD1     | TACO1    |
|           | CSRP2   | Gstm5      | PDLIM7     | HSD11B1  |
|           | ACTN1   | KRT18      | GPX3       | CD109    |
|           | TAGLN   | INPP1      | PSPH       | CPS1     |
|           | PRELP   | KRT8       | TEX2       | FLNA     |
|           | NAAA    | MFGE8      | PDLIM3     | Lmod1    |
|           | HBB     | LUM        | SOD3       | CLYBL    |
|           | CP      | ACTG2      | VNN1       | FKBP5    |
|           | PODN    | CRP        | VNN1       | CSRP1    |
|           | KRT19   | THA2       | FBLIM1     | MYH11    |
|           | Echdc3  | LECT2      | CKB        | MUSTN1   |
|           | APOE    | COL12A1    | FABP4      | BGN      |
|           | ACAT2   | PTGIS      | ORM1       | ACAA1    |
|           | AKR1C1  | SERPINA3-3 | THEM4      | ATP6V0C  |
|           | ANGPTL2 | CES1       | F9         | SHMT1    |
|           | MGRN1   | HPX        | RGN        | ANXA8    |
