# Supplementary material for: LncRNA and Protein Expression Profiles Reveal Heart Adaptation to High-Altitude Hypoxia in Tibetan Sheep
Source: MDPI journal article supplement (doi:10.3390/ijms25010385), 2023-12-27
Supplement: s1 [file s1]

Table S1 Differential expression of LncRNA at three different altitudes

| Compared group |      | Lnc RNA symbol     |                    |                    |                    |
|----------------|------|--------------------|--------------------|--------------------|--------------------|
| TS25 vs TS35   | Up   | ENSOART00020040699 | ENSOART00020013993 | MSTRG.4748.1       | ENSOART00020036454 |
|                |      | MSTRG.3474.4       | MSTRG.8419.1       | MSTRG.11593.3      | MSTRG.7244.2       |
|                |      | MSTRG.5381.3       | ENSOART00020007598 | ENSOART00020008187 | MSTRG.11667.1      |
|                |      | MSTRG.3591.1       | MSTRG.14946.1      | MSTRG.9775.2       | ENSOART00020030306 |
|                |      | MSTRG.14778.4      | ENSOART00020008602 | MSTRG.1967.2       | ENSOART00020023191 |
|                |      | ENSOART00020012333 | MSTRG.5118.3       | MSTRG.6008.1       |                    |
|                | Down | MSTRG.2891.1       | MSTRG.3437.1       | MSTRG.6851.1       | ENSOART00020005636 |
|                |      | MSTRG.9580.8       | MSTRG.16666.3      | MSTRG.16669.1      | MSTRG.2891.2       |
|                |      | ENSOART00020016244 | MSTRG.14712.2      | MSTRG.11178.1      | ENSOART00020038336 |
|                |      | ENSOART00020019773 | ENSOART00020038988 | MSTRG.16857.2      | MSTRG.11079.1      |
|                |      | ENSOART00020006640 | ENSOART00020023776 | MSTRG.6851.2       | MSTRG.11152.1      |
|                |      | ENSOART00020037755 | MSTRG.16115.4      | MSTRG.16738.5      |                    |
| TS35 vs TS45   | Up   | MSTRG.11461.1      | MSTRG.8526.1       | MSTRG.12584.1      | MSTRG.6375.3       |
|                |      | MSTRG.13743.1      | ENSOART00020016099 | MSTRG.15337.1      | MSTRG.5153.2       |
|                |      | MSTRG.5766.1       | MSTRG.4018.1       | MSTRG.5765.2       | MSTRG.1354.2       |
|                |      | MSTRG.13098.1      | ENSOART00020034906 | MSTRG.1441.2       | MSTRG.7132.1       |
|                |      | MSTRG.1349.1       | ENSOART00020005896 | MSTRG.10045.1      | MSTRG.16409.1      |
|                |      | MSTRG.1.1          | MSTRG.13743.2      | ENSOART00020030999 | MSTRG.362.1        |
|                |      | MSTRG.11178.1      | ENSOART00020016687 | ENSOART00020030632 | ENSOART00020033045 |
|                |      | MSTRG.5938.1       | MSTRG.9580.8       | MSTRG.6359.8       | MSTRG.6654.3       |
|                |      | MSTRG.16092.2      | MSTRG.2098.2       | MSTRG.5943.1       |                    |
|                | Down | ENSOART00020016122 | MSTRG.16222.3      | MSTRG.983.1        | ENSOART00020024749 |
|                |      | ENSOART00020006729 | MSTRG.1193.1       | MSTRG.11772.1      | MSTRG.15339.1      |
|                |      | MSTRG.1341.1       | MSTRG.2891.2       | ENSOART00020034936 | ENSOART00020007265 |
|                |      | MSTRG.6526.1       | MSTRG.4748.1       | ENSOART00020036454 | ENSOART00020010767 |
|                |      | MSTRG.1967.2       | MSTRG.12014.1      | MSTRG.15217.3      | MSTRG.16732.1      |
|                |      | ENSOART00020013577 | ENSOART00020008220 | MSTRG.2114.1       | ENSOART00020005091 |
|                |      | MSTRG.4037.2       | ENSOART00020008223 | ENSOART00020036492 | MSTRG.14115.2      |
|                |      | MSTRG.5118.3       | MSTRG.16647.1      | MSTRG.983.2        | MSTRG.12489.1      |
|                |      | ENSOART00020040698 | ENSOART00020004609 | ENSOART00020029824 | MSTRG.1877.1       |
|                |      | ENSOART00020002796 | ENSOART00020031167 | ENSOART00020013655 | ENSOART00020012616 |
|                |      | MSTRG.1100.8       | ENSOART00020003573 | MSTRG.10026.1      | MSTRG.14115.1      |
|                |      | ENSOART00020023191 | MSTRG.4574.1       | MSTRG.11195.1      | MSTRG.9775.1       |
|                |      | MSTRG.1100.10      | ENSOART00020008273 | ENSOART00020000618 | ENSOART00020025894 |
|                |      | MSTRG.16347.1      | ENSOART00020016070 | ENSOART00020036371 | MSTRG.5069.1       |
| TS25 vs TS45   | Up   | ENSOART00020040699 | MSTRG.13098.1      | MSTRG.7726.1       | ENSOART00020006963 |
|                |      | MSTRG.5766.1       | ENSOART00020040396 | ENSOART00020019309 | MSTRG.1259.1       |
|                |      | ENSOART00020013993 | MSTRG.11593.2      | MSTRG.7916.4       | ENSOART00020029432 |
|                |      | MSTRG.13743.1      | ENSOART00020006750 | ENSOART00020013887 | ENSOART00020030306 |
|                |      | MSTRG.9211.2       | ENSOART00020024421 | MSTRG.13743.2      | ENSOART00020001286 |

|      |                    |                    |                    |                    |
|------|--------------------|--------------------|--------------------|--------------------|
|      | MSTRG.5938.1       | MSTRG.5153.2       | ENSOART00020039283 | MSTRG.1.1          |
|      | ENSOART00020023685 | ENSOART00020029670 | MSTRG.5943.1       | MSTRG.10631.1      |
|      | MSTRG.3591.1       | MSTRG.1349.1       | ENSOART00020002028 | MSTRG.5381.3       |
|      | MSTRG.362.1        | MSTRG.10045.1      | MSTRG.13236.1      | ENSOART00020038924 |
|      | ENSOART00020008187 | ENSOART00020030440 | MSTRG.12760.1      | MSTRG.14946.1      |
|      | ENSOART00020010355 | MSTRG.3416.1       | MSTRG.4018.1       |                    |
|      | MSTRG.11593.3      | MSTRG.5765.2       | MSTRG.4183.2       |                    |
| Down | MSTRG.6851.2       | ENSOART00020023769 | ENSOART00020005636 | MSTRG.12489.1      |
|      | ENSOART00020016122 | ENSOART00020040698 | MSTRG.6541.2       | MSTRG.5820.1       |
|      | MSTRG.1341.1       | MSTRG.3437.1       | ENSOART00020006640 | MSTRG.11679.1      |
|      | ENSOART00020003962 | MSTRG.16666.3      | MSTRG.17129.1      | MSTRG.11079.1      |
|      | MSTRG.1100.8       | MSTRG.14963.1      | MSTRG.15041.9      | MSTRG.15905.1      |
|      | ENSOART00020002796 | MSTRG.2938.1       | ENSOART00020003280 | MSTRG.16732.1      |
|      | MSTRG.1193.1       | MSTRG.16222.3      | MSTRG.10057.1      | ENSOART00020027412 |
|      | MSTRG.2891.2       | MSTRG.5672.1       | MSTRG.11152.1      | MSTRG.1100.10      |
|      | MSTRG.2114.1       | MSTRG.16669.1      | MSTRG.16240.1      | MSTRG.10057.2      |
|      | ENSOART00020008273 | MSTRG.16626.2      | MSTRG.12379.1      | MSTRG.9242.1       |
|      | MSTRG.2891.1       | MSTRG.14669.1      | MSTRG.9220.2       | MSTRG.7424.1       |
|      | MSTRG.7055.1       | MSTRG.12840.1      | ENSOART00020008220 | MSTRG.9211.1       |
|      | MSTRG.8681.5       | MSTRG.983.2        | MSTRG.14115.1      | MSTRG.13274.2      |
|      | MSTRG.1967.2       | MSTRG.13274.1      | MSTRG.6851.1       | MSTRG.16647.1      |
|      | MSTRG.10026.1      | MSTRG.10112.2      | MSTRG.8505.2       | ENSOART00020029824 |
|      | MSTRG.983.1        | ENSOART00020003573 | MSTRG.4185.1       | MSTRG.11772.1      |
|      | MSTRG.16347.1      |                    |                    |                    |

---
