# Supplementary material for: LncRNA and Protein Expression Profiles Reveal Heart Adaptation to High-Altitude Hypoxia in Tibetan Sheep
Source: MDPI journal article supplement (doi:10.3390/ijms25010385), 2023-12-27
Supplement: s1 [file s1]

Table S4 Differential expression LncRNAs in profile 5 and profile 7 of trend clustering

| Pattern      |                    | DE LncRNA          |               |               |
|--------------|--------------------|--------------------|---------------|---------------|
| Profile<br>3 | ENSOART00020002796 | ENSOART00020016070 | MSTRG.11195.1 | MSTRG.16347.1 |
|              | ENSOART00020003573 | ENSOART00020016122 | MSTRG.11772.1 | MSTRG.16626.2 |
|              | ENSOART00020003962 | ENSOART00020024749 | MSTRG.1193.1  | MSTRG.16647.1 |
|              | ENSOART00020004609 | ENSOART00020027412 | MSTRG.12014.1 | MSTRG.16732.1 |
|              | ENSOART00020005091 | ENSOART00020029824 | MSTRG.12379.1 | MSTRG.17129.1 |
|              | ENSOART00020006729 | ENSOART00020031167 | MSTRG.12489.1 | MSTRG.1877.1  |
|              | ENSOART00020007265 | ENSOART00020036492 | MSTRG.1341.1  | MSTRG.2891.2  |
|              | ENSOART00020008220 | ENSOART00020040698 | MSTRG.14115.1 | MSTRG.4037.2  |
|              | ENSOART00020008223 | MSTRG.10026.1      | MSTRG.14115.2 | MSTRG.7424.1  |
|              | ENSOART00020008273 | MSTRG.1100.10      | MSTRG.15339.1 | MSTRG.983.1   |
|              | ENSOART00020013655 | MSTRG.1100.8       | MSTRG.16222.3 | MSTRG.983.2   |
| Profile<br>7 | ENSOART00020002028 | ENSOART00020029432 | MSTRG.10631.1 | MSTRG.4183.2  |
|              | ENSOART00020006963 | ENSOART00020029670 | MSTRG.11593.2 | MSTRG.5153.2  |
|              | ENSOART00020010355 | ENSOART00020030440 | MSTRG.11593.3 | MSTRG.5765.2  |
|              | ENSOART00020013887 | ENSOART00020038924 | MSTRG.13236.1 | MSTRG.5938.1  |
|              | ENSOART00020013993 | ENSOART00020040396 | MSTRG.3416.1  | MSTRG.7916.4  |
|              | ENSOART00020019309 | MSTRG.10045.1      | MSTRG.362.1   |               |
| analysis     |                    |                    |               |               |
