# Supplementary material for: LncRNA and Protein Expression Profiles Reveal Heart Adaptation to High-Altitude Hypoxia in Tibetan Sheep
Source: MDPI journal article supplement (doi:10.3390/ijms25010385), 2023-12-27
Supplement: s1 [file s1]

Table S3 Differentiation in lncRNA targets genes and DEPs involved with altitude hypoxia adaptation

| Description                               | Pathway                                               |                        |                                                                                                                                                                                                                                                                                                                      |
|-------------------------------------------|-------------------------------------------------------|------------------------|----------------------------------------------------------------------------------------------------------------------------------------------------------------------------------------------------------------------------------------------------------------------------------------------------------------------|
| Metabolism of cofactors and vitamins      | Retinol metabolism(ko00830)                           | DE lncRNA target genes | UGT2B31; UGT2C1; CYP4A6; RDH16; HSD17B6; BCO1; UGT1A3; <b>ADH1C</b> ; ADH6; CYP2B4; CYP2B11; CYP2C18; CYP3A28; CYP3A24; CYP1A2; CYP1A1                                                                                                                                                                               |
|                                           |                                                       | DEPs                   | ALDH1A1; <b>ADH1C</b> ; AOX1                                                                                                                                                                                                                                                                                         |
| Cancer: overview                          | Chemical carcinogenesis - DNA adducts(ko05204)        | DE lncRNA target genes | UGT2B31; UGT2C1; UGT1A3; CYP2E1; CYP2A13; SULT2A1; <b>ADH1C</b> ; CBR1; ADH6; CYP2B4; CYP2B11; CYP2C18; GSTA1; CYP3A28; CYP3A24; CYP1A2; CYP1A1                                                                                                                                                                      |
|                                           |                                                       | DEPs                   | GSTM5; <b>ADH1C</b> ; HSD11B1; GSTT1                                                                                                                                                                                                                                                                                 |
| Lipid metabolism                          | Steroid hormone biosynthesis (ko00140)                | DE lncRNA target genes | CYP2D14; UGT2B31; UGT2C1; HSD17B6; AKR1D1; HSD17B12-B; UGT1A3; <b>AKR1C1</b> ; <b>PGFS</b> ; CYP2E1; CYP2B4; CYP2B11; CYP3A28; CYP3A24; CYP1A2; CYP1A1                                                                                                                                                               |
|                                           |                                                       | DEPs                   | <b>AKR1C1</b> ; <b>PGFS</b> ; HSD11B1                                                                                                                                                                                                                                                                                |
| Endocrine system                          | PPAR signaling pathway(ko03320)                       | DE lncRNA target genes | <b>APOA2</b> ; FABP1; HMGCS2; CYP4A6; SLC27A2; PCK1; <b>FABP4</b> ; CYP8B1; APOC3                                                                                                                                                                                                                                    |
|                                           |                                                       | DEPs                   | <b>APOA2</b> ; CPT1A; <b>FABP4</b> ; ACSL3; FABP7; EHHADH; APOC3; APOA1; ACAA1; ACOX3                                                                                                                                                                                                                                |
| Xenobiotics biodegradation and metabolism | Metabolism of xenobiotics by cytochrome P450(ko00980) | DE lncRNA target genes | UGT2B31; UGT2C1; UGT1A3; CYP2E1; CYP2A13; SULT2A1; <b>ADH1C</b> ; CBR1; ADH6; GSTA1; CYP1A2; CYP1A1                                                                                                                                                                                                                  |
|                                           |                                                       | DEPs                   | GSTM5; <b>ADH1C</b> ; HSD11B1; GSTT1; CYP2F3                                                                                                                                                                                                                                                                         |
| Digestive system                          | Cholesterol metabolism(ko04979)                       | DE lncRNA target genes | <b>APOA2</b> ; ABCB11; APOC2; <b>APOH</b> ; APOB; APOA4; <b>APOC3</b>                                                                                                                                                                                                                                                |
|                                           |                                                       | DEPs                   | <b>APOA2</b> ; TSPO; <b>APOH</b> ; APOE; <b>APOC3</b> ; APOA1; NPC1                                                                                                                                                                                                                                                  |
| Digestive system                          | Fat digestion and absorption(ko04975)                 | DE lncRNA target genes | FABP1; MTP; APOB; <b>APOA4</b>                                                                                                                                                                                                                                                                                       |
|                                           |                                                       | DEPs                   | <b>APOA4</b> ; APOA1                                                                                                                                                                                                                                                                                                 |
| Biological processes                      | inflammatory response (GO:0006954)                    | DE lncRNA target genes | <b>APOA2</b> ; KNG1; AHSG; <b>A1M</b> ; C3; C5; C9; <b>CRP</b> ; <b>LBP</b> ; HP; KLKB1; TF; C8A; AOC3; AOC3; F2; VTN; <b>IDO1</b> ; C3                                                                                                                                                                              |
|                                           |                                                       | DEPs                   | <b>CRP</b> ; <b>A1M</b> ; <b>APOA2</b> ; <b>LBP</b> ; TFRC; THBS1; C4BPA; ORM1; ITIH4; CFP; HLA-DRB1; EPHX2; VNN1; FN1; GPX1; <b>IDO1</b>                                                                                                                                                                            |
| Biological processes                      | Protein activation cascade (GO:0072376)               | DE lncRNA target genes | KNG1; <b>A1M</b> ; C3; C5; C9; <b>APOH</b> ; <b>CRP</b> ; MASP2; FGG; FGB; KLKB1; C8A; F2; <b>IGLV1-40</b> ; C3                                                                                                                                                                                                      |
|                                           |                                                       | DEPs                   | IGKC; <b>A1M</b> ; <b>APOH</b> ; VWF; CFD; F9; C4BPA; <b>CRP</b> ; CLU; CFP; IGLV2-11; IGLV3-25; IGLV3-19; C1QC; <b>IGLV1-40</b> ; IGLV2-14; IGLV3-1                                                                                                                                                                 |
| Biological processes                      | Response to lipid (GO:0033993)                        | DE lncRNA target genes | <b>APOA2</b> ; SLC01B3; HMGCS2; CYP4A6; GC; FHL2; <b>FBP1</b> ; <b>ALDOB</b> ; <b>KRT19</b> ; <b>AKR1C1</b> ; <b>PGFS</b> ; <b>CRP</b> ; <b>LBP</b> ; PAH; HP; PCK1; HMBS; SULT2A1; <b>ADH1C</b> ; CBR1; TAT; ADH6; ARG1; <b>FABP4</b> ; FOS; CDO1; HAVCR1; CYP3A24; CYP3A24; CCL3; ABCC2; CYP1A2; CYP1A1; TTR; GBP6 |

|                      |                                                        |                        |                                                                                                                                                                                                                                                                                                                                            |
|----------------------|--------------------------------------------------------|------------------------|--------------------------------------------------------------------------------------------------------------------------------------------------------------------------------------------------------------------------------------------------------------------------------------------------------------------------------------------|
|                      |                                                        | DEPs                   | <b>KRT19</b> ; TSPO; <b>APOA2</b> ; PDXK; <b>ALDOB</b> ; NASP; <b>FBP1</b> ; <b>CRP</b> ; GPX4; MGP; <b>LBP</b> ; ACAT2; PRKCG; CST3; <b>ADH1C</b> ; SPARC; GBP3; CPT1A; <b>PGFS</b> ; TNC; <b>AKR1C1</b> ; <b>FABP4</b> ; CA2; PYCARD; THBS1; GSTM5; ORM1; S100B; CAT; PNMT; MAOB; HSPB6; CDK6; HSD11B1; GPX1; STAT1; FN1                 |
| Biological processes | Humoral immune response (GO:0006959)                   | DE lncRNA target genes | <b>A1M</b> ; C3; C5; C9; <b>CRP</b> ; MASP2; FGB; ZP2; C8A; <b>IGLV1-40</b> ; TUBA8                                                                                                                                                                                                                                                        |
|                      |                                                        | DEPs                   | IGKC; <b>A1M</b> ; IGHA1; HLA-DRB1; CFD; IGLV3-19; C4BPA; <b>CRP</b> ; CLU; CFP; IGLV3-1; IGLV3-25; <b>IGLV1-40</b> ; C1qc; BOLA-DQB; IGLV2-14; IGLV2-11                                                                                                                                                                                   |
| Biological processes | Response to oxygen-containing compound (GO:1901700)    | DE lncRNA target genes | <b>APOA2</b> ; AHSB; FABP1; HMGCS2; <b>FBP1</b> ; <b>ALDOB</b> ; ACTC1; <b>AKR1C1</b> ; <b>PGFS</b> ; CDH1; <b>CRP</b> ; HNF4A; <b>LBP</b> ; NPPA; HP; PCK1; SULT2A1; <b>ADH1C</b> ; ADH6; ARG1; <b>FABP4</b> ; FOS; TF; CDO1; CCL3; GCGR; GBP6                                                                                            |
|                      |                                                        | DEPs                   | <b>CRP</b> ; TSPO; <b>APOA2</b> ; <b>LBP</b> ; <b>ALDOB</b> ; PRKCG; <b>FBP1</b> ; <b>ADH1C</b> ; CA3; GBP3; CPT1A; HBB; TNC; CST3; <b>FABP4</b> ; FBLN5; HSPB6; PYCARD; ACAT2; THBS1; <b>AKR1C1</b> ; ORM1; SPARC; IGLV2-14; IGLV2-11; <b>PGFS</b> ; ACTG2; PNMT; MAOB; HLA-DRA; STAT1; FN1; ACTA1; CAT; HBA1; GPX1; MYH11; APOM; HSD11B1 |
| Biological processes | Immune effector process (GO:0002252)                   | DE lncRNA target genes | <b>APOA2</b> ; <b>A1M</b> ; C3; MX2; PGLYRP2; C5; C9; <b>IFI16</b> ; <b>CRP</b> ; <b>LBP</b> ; <b>HPX</b> ; MASP2; TUBB4A; C8A; CCL3; <b>CFHR2</b> ; HLA-DMB; <b>IGLV1-40</b> ; C3                                                                                                                                                         |
|                      |                                                        | DEPs                   | IGKC; <b>A1M</b> ; <b>APOA2</b> ; <b>LBP</b> ; LGALS1; MX1; C4BPA; <b>CRP</b> ; SAMHD1; GBP3; FADD; <b>HPX</b> ; <b>IFI16</b> ; PGLYRP1; CLU; S100B; HLA-DRB1; CFD; RFTN1; C1QC; CD74; IGHA1; PYCARD; IGLV3-25; STAT1; MPO; LGALS3; CFP; <b>CFHR2</b> ; BOLA-DQB; IGLV2-14; IGLV2-11; <b>IGLV1-40</b> ; IGLV3-1; IGLV3-19                  |
| Biological processes | Regulation of cell proliferation (GO:0042127)          | DE lncRNA target genes | KNG1; FABP1; <b>AKR1C1</b> ; <b>PGFS</b> ; CPB2; CDH1; <b>APOH</b> ; NAP1L1; FAP; LRG1; HPN; ARG1; <b>FABP4</b> ; <b>RGN</b> ; TF; <b>ICA</b> ; CCL3; F2; KLB; <b>IDO1</b> ; CXCR3; HLA-DMB; <b>ABCC4</b>                                                                                                                                  |
|                      |                                                        | DEPs                   | <b>FABP4</b> ; TSPO; OGN; PRKCG; SPTA1; RIDA; CST3; GPX1; CLU; <b>PGFS</b> ; TNC; ECM1; TFF2; <b>AKR1C1</b> ; CD74; <b>RGN</b> ; THBS1; <b>APOH</b> ; FADD; COL18A1; LGALS3; PRKRA; CAMK2A; <b>ABCC4</b> ; HLA-DRB1; CD109; SPARC; <b>IDO1</b> ; LAMB1; S100B; SPARCL1; CASK; PYCARD; CDK6; IGHA1; ADK; <b>ICA</b> ; LTF; STAT1            |
| Biological processes | Reactive oxygen species metabolic process (GO:0072593) | DE lncRNA target genes | <b>CRP</b> ; HP; <b>RGN</b> ; CYP1A2; CYP1A1                                                                                                                                                                                                                                                                                               |
|                      |                                                        | DEPs                   | <b>CRP</b> ; FBLN5; HBB; CAT; MAOB; GPX1; HBA1; GCHFR; GPX4; <b>RGN</b> ; MPO; TXNRD1; GPX3                                                                                                                                                                                                                                                |
